# Supplementary material for: Bio-inspired Hybrid Carbon Nanotube Muscles
Source: PubMed Central journal article supplement (PMC4879622; doi:10.1038/srep26687), 2016-05-25
Supplement: srep26687-s1.pdf [file srep26687-s1.pdf]

# Supporting Information

## Bio-inspired Hybrid Carbon Nanotube Muscles

Tae Hyeob Kim<sup>1,\*</sup>, Cheong Hoon Kwon<sup>1,\*</sup>, Changsun Lee<sup>1</sup>, Jieun An<sup>2</sup>, Tam Thi Thanh Phuong<sup>2</sup>, Sun Hwa Park<sup>2</sup>, Márcio D. Lima<sup>3</sup>, Ray H. Baughman<sup>3</sup>, Tong Mook Kang<sup>2,†</sup>, and Seon Jeong Kim<sup>1,†</sup>

<sup>1</sup>Center for Self-powered Actuation, Department of Biomedical Engineering, Hanyang University, Seoul, 04763, Korea.

<sup>2</sup>Department of Physiology, Samsung Biomedical Research Institute, Sungkyunkwan University School of Medicine, Suwon, 16419, Korea

<sup>3</sup>The Alan G. MacDiarmid NanoTech Institute, University of Texas at Dallas, Richardson, TX 75083, USA

\* These authors contributed equally to this work.

†To whom correspondence should be addressed: [sjk@hanyang.ac.kr](mailto:sjk@hanyang.ac.kr) and [tongmkang@skku.edu](mailto:tongmkang@skku.edu)

## Supplementary Movies

**Movie S1.** Real-time tracing of the contraction and relaxation of a single myotube.

**Movie S2.** Contraction of hornworm-like hybrid muscle.

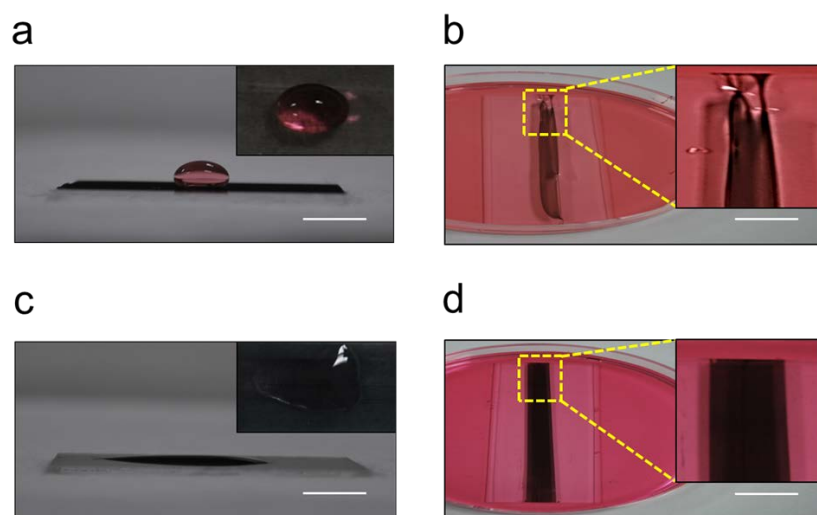

**Figure S1.** Comparison of the hydrophilicity of a bare MWCNT and a PEDOT-coated MWCNT sheets. (a) When cell culture medium (DMEM) is dropped on a bare MWCNT, the drop on it maintains a higher contact angle (Scale bar: 1 cm). (b) Fully-sunk bare MWCNT sheet with partially damaged structure in culture medium (Scale bar: 2 cm). (c) While, the drops on a PEDOT/MWCNT sheet, spread widely, indicating its hydrophilicity (Scale bar: 1 cm). (d) Fully-sunk PEDOT/MWCNT sheet showing the shape-maintenance property in culture medium (Scale bar: 2 cm)

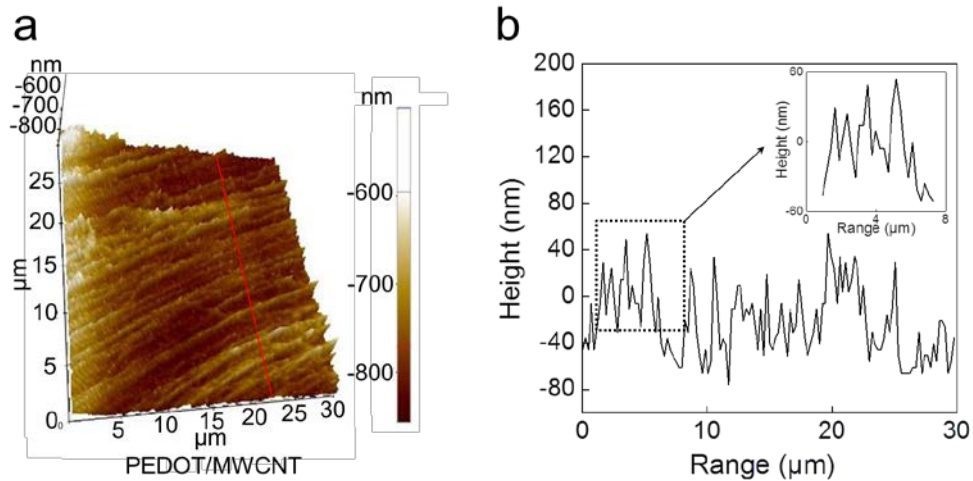

**Figure S2.** SICM image of the PEDOT/MWCNT sheet surface. The manufactured PEDOT/MWCNT sheet is prepared on a slide glass and placed in PBS buffer solution, and then a SICM image of the surface is obtained. **(a)** A three-dimensional SICM image of a PEDOT/MWCNT sheet surface. Scan size:  $30 \times 30 \mu\text{m}$ . **(b)** Graph of the SICM image. The inset shows an enlarged line profile from the dashed box.

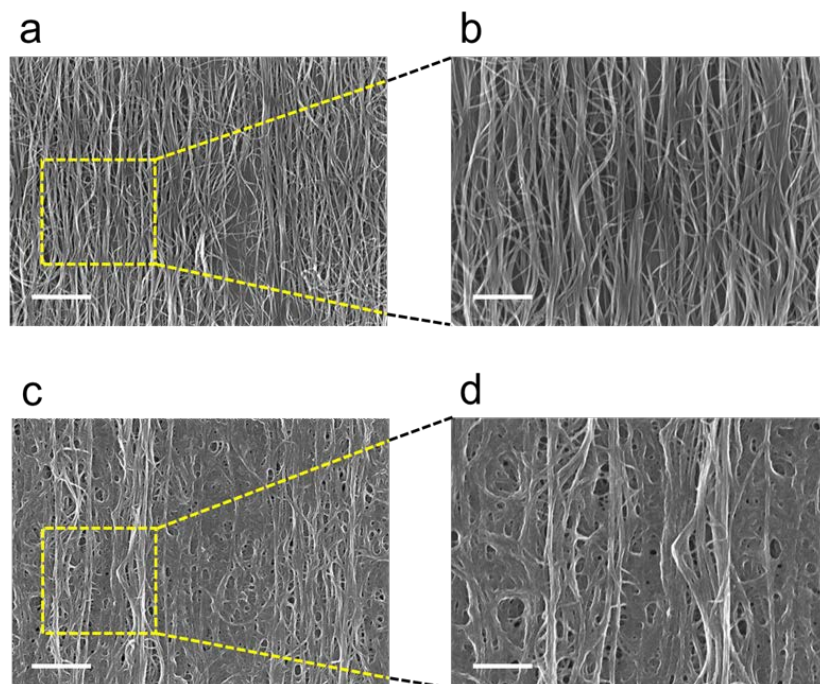

**Figure S3.** Comparison of each surface of a bare MWCNT sheet and a PEDOT-coated MWCNT sheet. **(a)** The surface image of a bare MWCNT sheet. Each carbon nanotube is well-aligned with an axial direction (Scale bar: 1  $\mu\text{m}$ ) and **(b)** is a close-up SEM image of Fig. S3a (Scale bar: 250 nm). **(c)** The surface image of a PEDOT-coated MWCNT sheet. Compared to a bare MWCNT sheet, CNT bundles are densely placed with coating PEDOT polymer, and still kept the alignment from the bare MWCNT sheet (Scale bar: 1  $\mu\text{m}$ ). **(d)** a close-up SEM image of Fig. S3c (Scale bar: 250 nm).

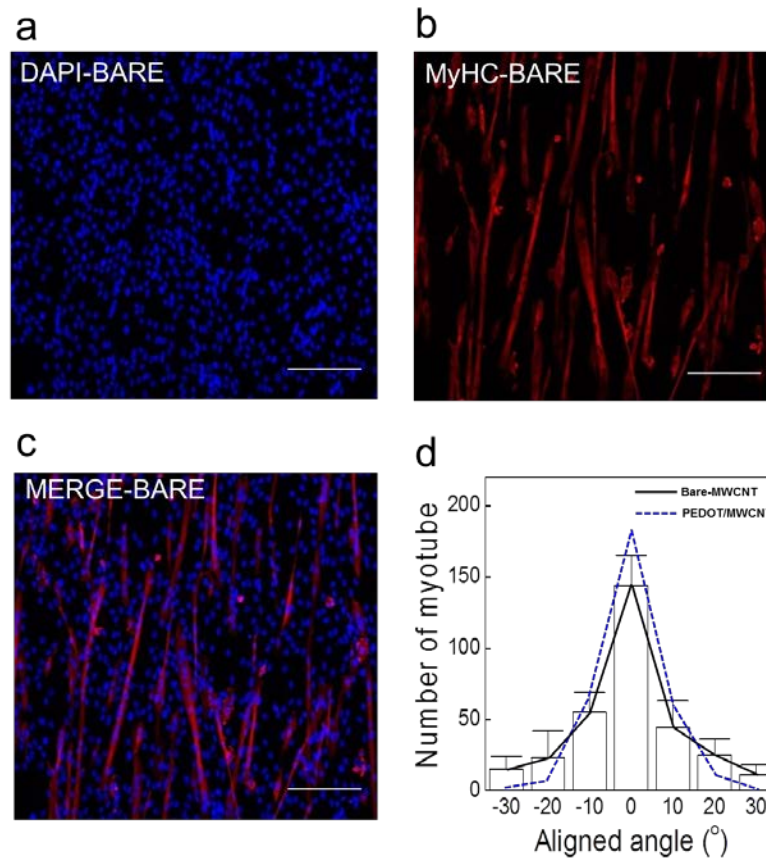

**Figure S4.** MyHC<sup>+</sup> C2C12 myotubes differentiated on bare MWCNT sheet. The degree of differentiation and cell alignment on the bare MWCNT sheet is lower than that on the PEDOT/MWCNT sheet. (a) Nuclear staining with DAPI. (b) MyHC immunocytochemistry of the myotubes. (c) Merged image of DAPI and MyHC (Scale bars: 100  $\mu$ m). (d) Myotube alignment ratio analyzed by constructed angular spread distribution histogram. About 46 % of the myotubes are aligned with the direction of alignment of the bare MWCNT sheet ( $0^\circ$  aligned angle, n = 70).

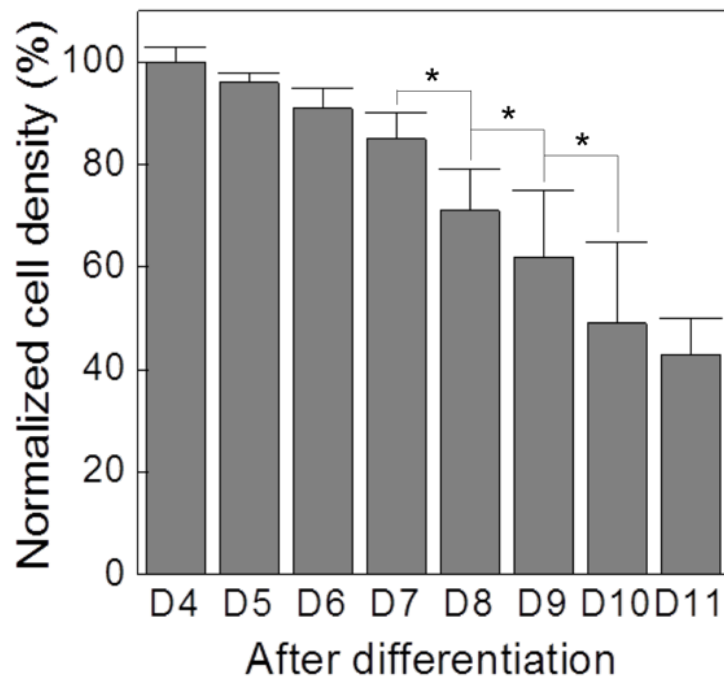

**Figure S5.** The plot of the normalized cell densities according to the time (after differentiation) (\*  $p < 0.05$ ,  $n = 5$ ).
